# Supplementary material for: Global quantitative analysis of the human brain proteome in Alzheimer’s and Parkinson’s Disease
Source: PubMed Central journal article supplement (PMC5848788; doi:10.1038/sdata.2018.36), 2018-03-13
Supplement: sdata201836-s2.pdf [file sdata201836-s2.pdf]

## Supplementary Table of Contents

- 1) Supplementary Figure 1: SDS-PAGE analysis of brain homogenates. Page 1
- 2) Supplementary Figure 2: Protein-specific expression in human brain. Page 2
- 3) Supplementary Table 1: Sample arrangement for frontal cortex. Page 3
- 4) Supplementary Table 2: Sample arrangement for anterior cingulate gyrus. Page 4
- 5) Supplementary Table 3: Human Brain Gene Expression by RNA-seq.
- 6) Supplementary Table 4: GO analysis for 402 genes identified by proteomics but not by Human Atlas brain RNA-seq. Page 5
- 1) Supplementary Table 5: SD values in 5 subsections in all 10 batches. Page 6
- 2) Supplementary Table 6: Protein filter criterion. Page 7

**a** Frontal cortex

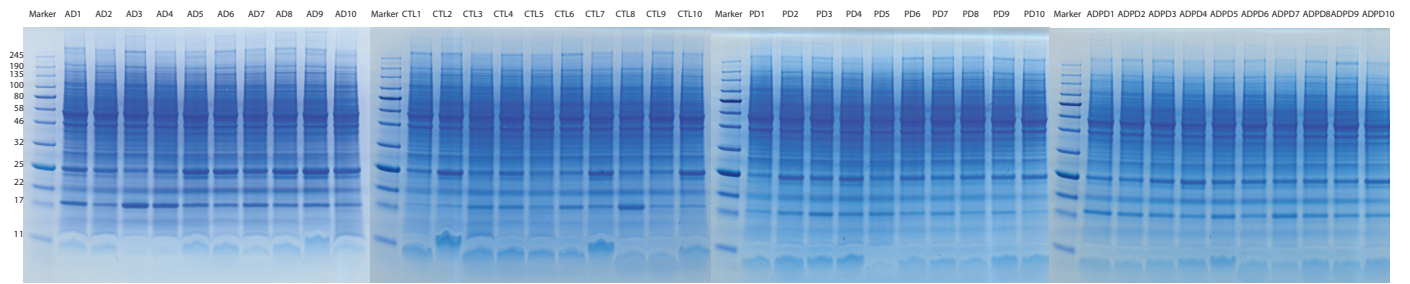

**b** Anterior cingulate

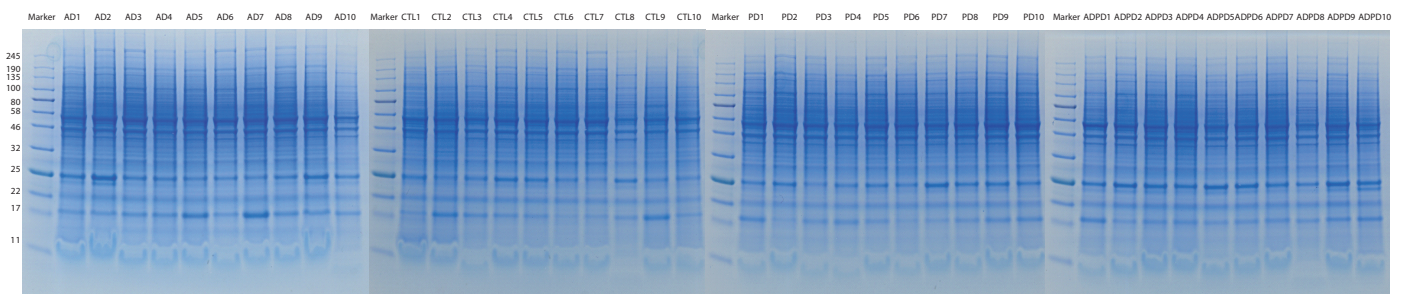

**a**

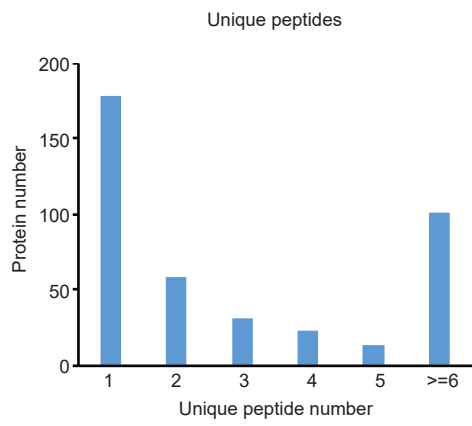

**b**

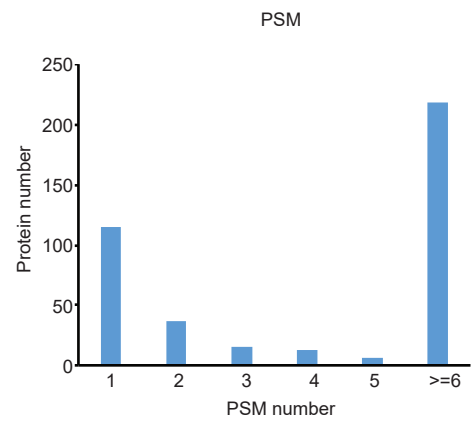

| Batch Number | Machine  | AD      |          | Control |          | PD       |          | ADPD    |         |
|--------------|----------|---------|----------|---------|----------|----------|----------|---------|---------|
|              |          | 127C    | 127N     | 128C    | 128N     | 129C     | 129N     | 130C    | 130N    |
| 1            | Fusion 1 | E08-53  | OS00-12  | E05-130 | E06-41   | OS01-70  | OS97-53  | E06-128 | E06-37  |
| 2            | Fusion 2 | OS00-32 | OS03-163 | A86-46  | OS03-299 | OS00-18  | OS97-10  | OS99-30 | E05-179 |
| 3            | Fusion 2 | E04-186 | E05-04   | A93-03  | OS02-35  | E04-152  | OS99-26  | E05-132 | OS00-28 |
| 4            | Fusion 1 | E06-155 | E05-87   | E08-101 | A87-50   | OS02-207 | OS03-396 | E04-68  | E06-15  |
| 5            | Fusion 2 | OS00-11 | OS98-11  | OS00-06 | E08-145  | OS02-66  | OS02-208 | E06-13  | E04-49  |

Supplementary table 1. Sample arrangement for frontal cortex.

| Batch Number | Machine  | AD      |          | Control  |         | PD       |          | ADPD    |         |
|--------------|----------|---------|----------|----------|---------|----------|----------|---------|---------|
|              |          | 127C    | 127N     | 128C     | 128N    | 129C     | 129N     | 130C    | 130N    |
| 1            | Fusion 1 | OS98-11 | OS00-11  | A86-46   | A93-03  | OS97-53  | OS02-208 | OS99-30 | OS00-28 |
| 2            | Fusion 1 | OS00-32 | OS03-163 | OS00-06  | OS02-35 | OS03-392 | OS03-395 | E04-49  | E04-68  |
| 3            | Fusion 1 | E04-186 | E05-04   | OS03-299 | E05-74  | OS03-396 | E04-152  | E05-132 | E05-179 |
| 4            | Fusion 1 | E05-56  | E05-87   | E05-130  | E06-41  | E04-169  | E05-81   | E06-15  | E06-37  |
| 5            | Fusion 1 | E06-155 | E08-53   | E08-101  | E08-145 | E09-136  | E15-132  | E06-128 | E13-11  |

Supplementary table 2. Sample arrangement for anterior cingulate gyrus.

| GO aspect          | Z score | Ontology Name                                                          |
|--------------------|---------|------------------------------------------------------------------------|
| biological_process | 13.04   | detection of chemical stimulus involved in sensory perception of smell |
| biological_process | 11.7    | humoral immune response                                                |
| biological_process | 11.25   | neuropeptide signaling pathway                                         |
| biological_process | 10.48   | protein activation cascade                                             |
| biological_process | 8.23    | retina homeostasis                                                     |
| cellular_component | 14.06   | blood microparticle                                                    |
| cellular_component | 9.47    | keratin filament                                                       |
| cellular_component | 8.97    | extracellular region                                                   |
| cellular_component | 7       | extracellular space                                                    |
| cellular_component | 6.13    | membrane attack complex                                                |
| molecular_function | 13.04   | olfactory receptor activity                                            |
| molecular_function | 11.1    | phosphatidate phosphatase activity                                     |
| molecular_function | 10.91   | G-protein coupled receptor activity                                    |
| molecular_function | 9.77    | IgA binding                                                            |
| molecular_function | 8.09    | antigen binding                                                        |

[Supplementary table 4](#). GO analysis for 402 genes identified by proteomics but not by Human Atlas brain RNA-seq.

| Brain Region       | Batch Number | Log <sub>10</sub> normalized abundance |        |        |        |       |
|--------------------|--------------|----------------------------------------|--------|--------|--------|-------|
|                    |              | <1                                     | 1 to 2 | 2 to 3 | 3 to 4 | >4    |
| Frontal cortex     | 1            | 0.558                                  | 0.252  | 0.101  | 0.050  | 0.039 |
|                    | 2            | 0.658                                  | 0.271  | 0.094  | 0.045  | NA    |
|                    | 3            | 0.654                                  | 0.269  | 0.097  | 0.042  | NA    |
|                    | 4            | 0.615                                  | 0.237  | 0.102  | 0.051  | 0.041 |
|                    | 5            | 0.641                                  | 0.261  | 0.093  | 0.043  | NA    |
| Anterior cingulate | 1            | 0.526                                  | 0.321  | 0.208  | 0.067  | 0.039 |
|                    | 2            | 0.644                                  | 0.336  | 0.194  | 0.070  | 0.039 |
|                    | 3            | 0.598                                  | 0.335  | 0.200  | 0.055  | 0.035 |
|                    | 4            | 0.600                                  | 0.346  | 0.185  | 0.066  | 0.038 |
|                    | 5            | 0.652                                  | 0.326  | 0.182  | 0.067  | 0.037 |

[Supplementary table 5](#). SD values in 5 subsections in all 10 batches.

When the subsection protein count is less than 5, all proteins for that subsection is kept and no filter is applied. These subsections are given an "NA".

| Brain region       | Batch NO. | 1SD   | 2SD   | 3SD   | 4SD   | No filter |
|--------------------|-----------|-------|-------|-------|-------|-----------|
| Frontal cortex     | 1         | 6,075 | 7,938 | 8,268 | 8,335 | 8,357     |
|                    | 2         | 5,736 | 7,471 | 7,802 | 7,863 | 7,875     |
|                    | 3         | 5,640 | 7,352 | 7,719 | 7,769 | 7,780     |
|                    | 4         | 6,430 | 8,262 | 8,580 | 8,635 | 8,654     |
|                    | 5         | 5,374 | 7,040 | 7,348 | 7,406 | 7,420     |
| Anterior cingulate | 1         | 6,715 | 7,905 | 8,061 | 8,109 | 8,165     |
|                    | 2         | 6,867 | 8,074 | 8,221 | 8,266 | 8,316     |
|                    | 3         | 7,010 | 8,198 | 8,365 | 8,401 | 8,447     |
|                    | 4         | 6,625 | 7,695 | 7,861 | 7,900 | 7,935     |
|                    | 5         | 6,858 | 7,895 | 8,055 | 8,090 | 8,136     |

**Supplementary table 6.** Protein filter criterion

All the data in each batch was divided into 5 sections, which was filter by individual SD criterion. All the proteins were combined in each batch at different filter condition.
